# Supplementary material for: Systematic Association Mapping Identifies NELL1 as a Novel IBD Disease Gene
Source: PubMed Central journal article supplement (PMC1933598; doi:10.1371/journal.pone.0000691), 2007-08-08
Supplement: pone.0000691.s012.pdf [file pone.0000691.s012.pdf]

**Supplementary Table 4:** Summary of the mutation detection of *NELL1*. All 21 exons plus the promoter were resequenced in 47 unrelated Crohn disease patients. Five not yet annotated polymorphisms were identified, including the two nonsynonymous SNPs *NELL1\_02* and *NELL1\_03*. Twenty-six annotated SNPs were verified.

| #  | SNP ID    | position<br>(build 35) | SNP type             | sequence                                                                                                                                                                                                                 |
|----|-----------|------------------------|----------------------|--------------------------------------------------------------------------------------------------------------------------------------------------------------------------------------------------------------------------|
| 1  | NELL1_01  | 20647024               | Promoter             | CTGCCCTGCAGAATGAGAAGGTTTGCAAATAGACTTCCCAAACCCCAACCAC<br>AGCTCGCTCCGCCTCGAGGACCCCTTTTCTGCACCCACCTCAGCGC[C/A]C<br>TCTTCTGCACCCACAAAGAGAGTACTCAGTCATAGGGGTTCAACAGGAGAG<br>AGGAGACAGAAGGTACAGGCGGTGAGCAGGGACTCAGCCATCATCCC   |
| 2  | NELL1_02  | 20825777               | nonsynonymous<br>R→S | AAACAAATGTTTGTTCCTTTACATACAGCTATTTGAACTGGAGAGCAGTGG<br>CCTGAGGGATGAGATTCGGTATCACTACATACACAATGGGAAGCCAAG[G/C]<br>ACAGAGGCACTTCCTTACCGCATGGCAGATGGACAATGGCACAAGGTTGCAC<br>TGTCAGTTAGCGCCTCTCATCTCCTGCTCCATGTCGACTGTAACAGGT |
| 3  | NELL1_03  | 20825826               | nonsynonymous<br>A→T | TGGCCTGAGGGATGAGATTCGGTATCACTACATACACAATGGGAAGCCAAG<br>GACAGAGGCACTTCCTTACCGCATGGCAGATGGACAATGGCACAAGGTT[G/<br>A]CACTGTCAGTTAGCGCCTCTCATCTCCTGCTCCATGTCGACTGTAACAGGT<br>ATTTCTTTGTCTTTGAGTGTGCTGATTCTGCCCTGAAATCAAGCAAT  |
| 4  | NELL1_04  | 21538300               | Intronic             | AGCACAAGGTAAATGGTCGATGATGTTAGTTAATGCTACTGCAAATGATGGT<br>TGTTTGTCTCTAAGTTCCTTGGCTAGATTCTAAGCTTCTGTGCTTC[C/A]TA<br>TATTGCAGACATTGATGAATGTGCCTTAAGAACTCACACCTGTTGGAACGAT<br>TCTGCCTGCATCAACCTGGCAGGGGGCTTTGACTGTCTCTGCCCT   |
| 5  | NELL1_05  | 20647336               | Promoter             | ATACCCACCCGCGAGGGCTCGGCGGCTTTTCGACTCGGCGGGGATGAACTGT<br>GGCAAATTCGGCAGCCCCACCGCGGTGCGGAAGTAAAGAGGGCAACA[T/C]<br>TGCGGACTGCGGCTCGGAGGGGCTGGAGCGCGTGAAGCCGTGGGGGGCGCCG<br>TGCGCCTCCCGCTCTCTCGTTTCGGCCGAGGTCCTGGGACTCCGACTT |
| 6  | rs1715283 | 20646687               | Promoter             | -                                                                                                                                                                                                                        |
| 7  | rs3808993 | 20646953               | Promoter             | -                                                                                                                                                                                                                        |
| 8  | rs1793003 | 20655970               | Intronic             | -                                                                                                                                                                                                                        |
| 9  | rs2280362 | 20761694               | Intronic             | -                                                                                                                                                                                                                        |
| 10 | rs8176785 | 20761862               | nonsynonymous<br>R→Q | -                                                                                                                                                                                                                        |
| 11 | rs2280363 | 20761911               | synonymous           | -                                                                                                                                                                                                                        |
| 12 | rs3740874 | 20896231               | Intronic             | -                                                                                                                                                                                                                        |
| 13 | rs1429785 | 20897351               | Intronic             | -                                                                                                                                                                                                                        |
| 14 | rs2293241 | 20905691               | Intronic             | -                                                                                                                                                                                                                        |

---

|    |           |          |               |   |
|----|-----------|----------|---------------|---|
| 15 | rs1880088 | 20915761 | Intronic      | - |
| 16 | rs8176786 | 20915970 | nonsynonymous | - |
|    |           |          | R→W           |   |
| 17 | rs1880087 | 20916005 | Intronic      | - |
| 18 | rs8176791 | 20916041 | Intronic      | - |
| 19 | rs1880086 | 20916058 | Intronic      | - |
| 20 | rs8176796 | 20925428 | Intronic      | - |
| 21 | rs2280584 | 20938470 | Intronic      | - |
| 22 | rs3758810 | 21091662 | Intronic      | - |
| 23 | rs1670638 | 21207776 | Intronic      | - |
| 24 | rs8176792 | 21349039 | synonymous    | - |
| 25 | rs4151056 | 21349063 | synonymous    | - |
| 26 | rs7119525 | 21538074 | Intronic      | - |
| 27 | rs7119475 | 21538241 | Intronic      | - |
| 28 | rs8176789 | 21538381 | synonymous    | - |
| 29 | rs8176790 | 21538573 | Intronic      | - |
| 30 | rs4922847 | 21548804 | Intronic      | - |
| 31 | rs8176793 | 21549083 | Intronic      | - |

---
