# Supplementary material for: Systematic Association Mapping Identifies NELL1 as a Novel IBD Disease Gene
Source: PubMed Central journal article supplement (PMC1933598; doi:10.1371/journal.pone.0000691), 2007-08-08
Supplement: pone.0000691.s015.pdf [file pone.0000691.s015.pdf]

**Supplementary Table 7:** Results of gender-stratified analysis for *5p13.1* SNPs. Only markers that showed a significant p-value in the single-point analysis of the two subgroups are shown. 378 controls and 343 CD cases were randomly drawn from each subgroup and odds ratios (OR) for carriership of the common allele are shown.

| #  | Name      | Position   | Females          |                 |      |           |                         |                      | Males            |                 |      |           |                         |                      |
|----|-----------|------------|------------------|-----------------|------|-----------|-------------------------|----------------------|------------------|-----------------|------|-----------|-------------------------|----------------------|
|    |           |            | p <sub>CCA</sub> | p <sub>CG</sub> | OR   | 95% CI    | MAF <sub>Controls</sub> | MAF <sub>Cases</sub> | p <sub>CCA</sub> | p <sub>CG</sub> | OR   | 95% CI    | MAF <sub>Controls</sub> | MAF <sub>Cases</sub> |
| 7  | rs1992662 | 40,429,609 | <b>0.0035</b>    | <b>0.0069</b>   | 2.14 | 1.25-3.66 | 0.35                    | 0.28                 | 0.13             | 0.35            | 1.33 | 0.80-2.21 | 0.29                    | 0.26                 |
| 8  | rs1992660 | 40,450,824 | <b>0.0057</b>    | <b>0.019</b>    | 1.73 | 1.11-2.69 | 0.40                    | 0.33                 | 0.10             | 0.29            | 1.32 | 0.84-2.05 | 0.36                    | 0.32                 |
| 11 | rs7725052 | 40,523,027 | <b>0.0016</b>    | <b>0.0013</b>   | 2.12 | 1.39-3.23 | 0.46                    | 0.38                 | 0.16             | 0.31            | 1.34 | 0.91-1.99 | 0.42                    | 0.38                 |
| 12 | rs1553575 | 40,538,689 | <b>0.00021</b>   | <b>0.00048</b>  | 1.74 | 1.03-2.97 | 0.37                    | 0.28                 | 0.26             | 0.26            | 1.55 | 0.92-2.60 | 0.32                    | 0.29                 |
| 15 | rs6451525 | 40,590,026 | <b>0.0011</b>    | <b>0.0019</b>   | 1.44 | 0.78-2.66 | 0.31                    | 0.23                 | 0.20             | 0.25            | 1.63 | 0.91-2.92 | 0.28                    | 0.25                 |
| 18 | rs4409138 | 40,639,362 | <b>0.032</b>     | 0.10            | 1.47 | 0.48-4.55 | 0.12                    | 0.09                 | 1.00             | 0.59            | 0.45 | 0.08-2.48 | 0.10                    | 0.10                 |
| 19 | rs924967  | 40,650,879 | <b>0.033</b>     | 0.11            | 1.47 | 0.48-4.54 | 0.12                    | 0.09                 | 0.94             | 0.57            | 0.45 | 0.08-2.47 | 0.10                    | 0.10                 |

| #  | Name      | Position   | Females                 |                      | Males                   |                      | Females                 |                      | Males                   |                      | Females                 |                      | Males                   |                      |
|----|-----------|------------|-------------------------|----------------------|-------------------------|----------------------|-------------------------|----------------------|-------------------------|----------------------|-------------------------|----------------------|-------------------------|----------------------|
|    |           |            | f11 <sub>Controls</sub> | f11 <sub>Cases</sub> | f11 <sub>Controls</sub> | f11 <sub>Cases</sub> | f12 <sub>Controls</sub> | f12 <sub>Cases</sub> | f12 <sub>Controls</sub> | f12 <sub>Cases</sub> | f22 <sub>Controls</sub> | f22 <sub>Cases</sub> | f22 <sub>Controls</sub> | f22 <sub>Cases</sub> |
| 7  | rs1992662 | 40,429,609 | 0.426                   | 0.509                | 0.517                   | 0.564                | 0.451                   | 0.430                | 0.377                   | 0.354                | 0.123                   | 0.061                | 0.106                   | 0.082                |
| 8  | rs1992660 | 40,450,824 | 0.362                   | 0.440                | 0.430                   | 0.482                | 0.472                   | 0.456                | 0.426                   | 0.405                | 0.166                   | 0.104                | 0.144                   | 0.113                |
| 11 | rs7725052 | 40,523,027 | 0.283                   | 0.351                | 0.362                   | 0.393                | 0.509                   | 0.539                | 0.443                   | 0.455                | 0.208                   | 0.110                | 0.195                   | 0.152                |
| 12 | rs1553575 | 40,538,689 | 0.372                   | 0.512                | 0.475                   | 0.494                | 0.516                   | 0.421                | 0.416                   | 0.432                | 0.112                   | 0.067                | 0.109                   | 0.074                |
| 15 | rs6451525 | 40,590,026 | 0.458                   | 0.589                | 0.537                   | 0.564                | 0.468                   | 0.358                | 0.376                   | 0.380                | 0.074                   | 0.053                | 0.087                   | 0.056                |
| 18 | rs4409138 | 40,639,362 | 0.773                   | 0.836                | 0.806                   | 0.812                | 0.206                   | 0.149                | 0.189                   | 0.176                | 0.021                   | 0.015                | 0.005                   | 0.012                |
| 19 | rs924967  | 40,650,879 | 0.774                   | 0.836                | 0.807                   | 0.815                | 0.205                   | 0.149                | 0.188                   | 0.173                | 0.021                   | 0.015                | 0.005                   | 0.012                |
