# Supplementary material for: Systematic Association Mapping Identifies NELL1 as a Novel IBD Disease Gene
Source: PubMed Central journal article supplement (PMC1933598; doi:10.1371/journal.pone.0000691), 2007-08-08
Supplement: pone.0000691.s016.pdf [file pone.0000691.s016.pdf]

**Supplementary Table 8:** SNP coverage of 100k Array for known IBD susceptibility loci. Variants of Table 4 were included (highlighted by grey shading) to calculate distances. Nucleotide positions refer to NCBI build 35 and the following gene regions were used:

*IL23R*: 67002085-67095564, *ATG16L1*: 234447031-234491134, *DLG5*: 78895154-79030951, *NOD2*: 50509083-50545020

| Gene           | Name                    | rs_number  | built35     | distance [kb] | CR   | MAF  | HWE      | P <sub>CCA</sub> | P <sub>CCG</sub> |
|----------------|-------------------------|------------|-------------|---------------|------|------|----------|------------------|------------------|
| <b>NOD2</b>    | <b>SNP 8/Arg702Trp</b>  | rs2066844  | 49,303,427  |               |      |      |          |                  |                  |
| <b>NOD2</b>    |                         | rs10521209 | 49,313,210  | 9.78          | 0.99 | 0.41 | 0.875429 | 1.26E-03         | 3.12E-03         |
| <b>NOD2</b>    | <b>SNP 12/Gly908Arg</b> | rs2066845  | 49,314,041  | 0.83          |      |      |          |                  |                  |
| <b>NOD2</b>    |                         | rs2076756  | 49,314,382  | 0.34          | 1.00 | 0.26 | 0.529660 | 1.93E-13         | 2.04E-12         |
| <b>NOD2</b>    | <b>SNP 13/Leu1007fs</b> | rs2066847  | 49,321,279  | 6.90          |      |      |          |                  |                  |
| <b>IL23R</b>   |                         | rs2863202  | 67,296,356  |               | 1.00 | 0.19 | 0.877133 | 3.92E-01         | 1.63E-01         |
| <b>IL23R</b>   |                         | rs10489631 | 67,313,136  | 16.78         | 1.00 | 0.44 | 0.780629 | 5.81E-01         | 7.08E-01         |
| <b>IL23R</b>   |                         | rs1321156  | 67,316,723  | 3.59          | 0.96 | 0.14 | 0.101553 | 3.73E-01         | 6.84E-01         |
| <b>IL23R</b>   |                         | rs10489630 | 67,374,643  | 57.92         | 0.98 | 0.38 | 0.724107 | 1.39E-01         | 1.09E-01         |
| <b>IL23R</b>   |                         | rs2863212  | 67,397,137  | 22.49         | 0.95 | 0.12 | 0.189607 | 3.38E-01         | 4.78E-01         |
| <b>IL23R</b>   |                         | rs10489629 | 67,400,370  | 3.23          | 1.00 | 0.43 | 0.558801 | 9.62E-02         | 2.30E-01         |
| <b>IL23R</b>   |                         | rs10489628 | 67,416,128  | 15.76         | 0.95 | 0.37 | 0.749220 | 5.27E-01         | 3.89E-01         |
| <b>IL23R</b>   | <b>Arg381Gln</b>        | rs11209026 | 67,417,979  | 1.85          |      |      |          |                  |                  |
| <b>IL23R</b>   |                         | rs4319296  | 67,489,611  | 71.63         | 1.00 | 0.03 | 0.232389 | 3.03E-01         | 2.46E-01         |
| <b>IL23R</b>   |                         | rs10489627 | 67,491,697  | 2.09          | 0.99 | 0.33 | 0.801662 | 3.44E-01         | 2.71E-01         |
| <b>DLG5</b>    |                         | rs1344967  | 79,197,624  |               | 1.00 | 0.28 | 0.459024 | 7.95E-01         | 3.79E-01         |
| <b>DLG5</b>    |                         | rs1561438  | 79,198,099  | 0.48          | 0.95 | 0.27 | 0.248734 | 6.30E-01         | 2.94E-01         |
| <b>DLG5</b>    | <b>DLG5 e26</b>         | -          | 79,236,487  | 38.39         |      |      |          |                  |                  |
| <b>DLG5</b>    | <b>Pro1371Gln</b>       | rs2289310  | 79,240,879  | 4.39          |      |      |          |                  |                  |
| <b>DLG5</b>    |                         | rs1866435  | 79,246,939  | 6.06          | 0.97 | 0.02 | 0.074601 | 6.64E-01         | 9.03E-01         |
| <b>DLG5</b>    |                         | rs1248630  | 79,253,862  | 6.92          | 0.93 | 0.27 | 0.993150 | 3.14E-01         | 1.16E-01         |
| <b>DLG5</b>    |                         | rs1248671  | 79,273,832  | 19.97         | 0.99 | 0.35 | 0.565555 | 2.98E-01         | 4.21E-01         |
| <b>DLG5</b>    | <b>Arg30Gln</b>         | rs1248696  | 79,286,611  | 12.78         |      |      |          |                  |                  |
| <b>DLG5</b>    |                         | rs7895188  | 79,293,384  | 6.77          | 0.98 | 0.32 | 0.838004 | 7.79E-02         | 1.60E-01         |
| <b>DLG5</b>    |                         | rs10509396 | 79,412,406  | 119.02        | 1.00 | 0.00 | 0.980005 | 3.21E-01         | -1.00E+00        |
| <b>ATG16L1</b> | <b>Thr300Ala</b>        | rs2241880  | 233,965,368 |               |      |      |          |                  |                  |
| <b>ATG16L1</b> |                         | -          | -           |               | -    |      | -        | -                | -                |
